# Supplementary material for: The Associations of Dietary Iron Intake and the Transferrin Receptor (TFRC) rs9846149 Polymorphism with the Risk of Gastric Cancer: A Case–Control Study Conducted in Korea
Source: MDPI journal article supplement (doi:10.3390/nu13082600), 2021-07-28
Supplement: s1 [file s1]

**Supplementary material Table S1. Association of total iron intake and nonheme iron intake with risk of gastric cancer  
stratified by *H. pylori* infection status**

| Iron (mg/day)                   | <i>H. pylori</i> -positive |                  |                       |                         | <i>H. pylori</i> -negative |                  |                       |                        |
|---------------------------------|----------------------------|------------------|-----------------------|-------------------------|----------------------------|------------------|-----------------------|------------------------|
|                                 | No. of controls (%)        | No. of cases (%) | Model I [OR (95% CI)] | Model II [OR (95% CI)]  | No. of controls (%)        | No. of cases (%) | Model I [OR (95% CI)] | Model II [OR (95% CI)] |
| <b>Total iron<sup>a</sup></b>   |                            |                  |                       |                         |                            |                  |                       |                        |
| <i>All</i>                      |                            |                  |                       |                         |                            |                  |                       |                        |
| T1 (<12.04)                     | 170 (36.6)                 | 138 (39.9)       | 1                     | 1                       | 81 (27.9)                  | 9 (32.1)         | 1                     | 1                      |
| T2 (12.04–14.76)                | 142 (30.6)                 | 125 (36.1)       | 1.08 (0.78–1.51)      | 1.12 (0.77–1.63)        | 108 (37.2)                 | 13 (46.4)        | 1.08 (0.44–2.66)      | 1.20 (0.44–3.33)       |
| T3 (≥14.76)                     | 152 (32.8)                 | 83 (24.0)        | 0.67 (0.47–0.95)      | <b>0.66 (0.44–0.98)</b> | 101 (34.8)                 | 6 (21.4)         | 0.54 (0.18–1.56)      | 0.40 (0.11–1.47)       |
| p for trend                     |                            |                  | 0.022                 | <b>0.035</b>            |                            |                  | 0.217                 | 0.151                  |
| <i>Males</i>                    |                            |                  |                       |                         |                            |                  |                       |                        |
| T1 (<11.67)                     | 117 (36.3)                 | 80 (35.1)        | 1                     | 1                       | 49 (28.2)                  | 5 (31.3)         | 1                     | 1                      |
| T2 (11.67–14.30)                | 100 (31.1)                 | 94 (41.2)        | 1.38 (0.92 – 2.05)    | 1.65 (1.02–2.67)        | 64 (36.8)                  | 6 (37.4)         | 0.92 (0.27–3.19)      | 1.26 (0.29–5.44)       |
| T3 (≥14.30)                     | 105 (32.6)                 | 54 (23.7)        | 0.75 (0.49 – 1.16)    | 0.81 (0.48–1.36)        | 61 (35.0)                  | 5 (31.3)         | 0.80 (0.22–2.93)      | 0.70 (0.13–3.74)       |
| p for trend                     |                            |                  | 0.165                 | 0.308                   |                            |                  | 0.738                 | 0.678                  |
| <i>Females</i>                  |                            |                  |                       |                         |                            |                  |                       |                        |
| T1 (<12.68)                     | 53 (37.3)                  | 58 (49.2)        | 1                     | 1                       | 32 (27.6)                  | 5 (41.7)         | 1                     | 1                      |
| T2 (12.68–15.80)                | 41 (28.9)                  | 30 (25.4)        | 0.67 (0.37 – 1.22)    | 0.86 (0.44–1.69)        | 46 (39.7)                  | 5 (41.7)         | 0.70 (0.19–2.60)      | 0.53 (0.10–2.80)       |
| T3 (≥15.80)                     | 48 (33.8)                  | 30 (25.4)        | 0.57 (0.32 – 1.03)    | 0.65 (0.34–1.26)        | 38 (32.7)                  | 2 (16.6)         | 0.34 (0.06–1.86)      | 0.47 (0.05–4.29)       |
| p for trend                     |                            |                  | 0.063                 | 0.202                   |                            |                  | 0.206                 | 0.451                  |
| <b>Nonheme iron<sup>a</sup></b> |                            |                  |                       |                         |                            |                  |                       |                        |
| <i>All</i>                      |                            |                  |                       |                         |                            |                  |                       |                        |
| T1 (<9.10)                      | 170 (36.6)                 | 150 (43.4)       | 1                     | 1                       | 81 (27.9)                  | 12 (42.9)        | 1                     | 1                      |
| T2 (9.10–11.02)                 | 153 (33.0)                 | 106 (30.6)       | 0.79 (0.56–1.09)      | 0.77 (0.53–1.13)        | 97 (33.5)                  | 9 (32.1)         | 0.63 (0.25–1.56)      | 0.58 (0.20–1.68)       |
| T3 (≥11.02)                     | 141 (30.4)                 | 90 (26.0)        | 0.72 (0.51–1.02)      | 0.70 (0.47–1.05)        | 112 (38.6)                 | 7 (25.0)         | 0.42 (0.16–1.12)      | 0.28 (0.09–1.94)       |
| p for trend                     |                            |                  | 0.067                 | 0.093                   |                            |                  | 0.088                 | 0.039                  |
| <i>Males</i>                    |                            |                  |                       |                         |                            |                  |                       |                        |
| T1 (<8.86)                      | 112 (34.8)                 | 95 (41.7)        | 1                     | 1                       | 54 (31.0)                  | 4 (25.0)         | 1                     | 1                      |
| T2 (8.86–10.73)                 | 109 (33.9)                 | 73 (32.0)        | 0.79 (0.53–1.18)      | 0.70 (0.43–1.13)        | 56 (32.2)                  | 6 (37.5)         | 1.45 (0.39–5.41)      | 1.26 (0.26–6.12)       |

|                     |            |           |                  |                  |           |          |                  |                  |
|---------------------|------------|-----------|------------------|------------------|-----------|----------|------------------|------------------|
| T3 ( $\geq 10.73$ ) | 101 (31.4) | 60 (26.3) | 0.70 (0.46–1.07) | 0.67 (0.40–1.12) | 64 (36.8) | 6 (37.5) | 1.27 (0.34–4.72) | 1.08 (0.22–5.34) |
| p for trend         |            |           | 0.099            | 0.136            |           |          | 0.789            | 0.948            |
| <b>Females</b>      |            |           |                  |                  |           |          |                  |                  |
| T1 ( $< 9.73$ )     | 56 (39.4)  | 59 (50.0) | 1                | 1                | 29 (25.0) | 7 (58.3) | 1                | 1                |
| T2 (9.73–11.69)     | 41 (28.9)  | 21 (17.8) | 0.49 (0.26–0.92) | 0.49 (0.24–1.03) | 45 (38.8) | 3 (25.0) | 0.28 (0.07–1.16) | 0.25 (0.04–1.51) |
| T3 ( $\geq 11.69$ ) | 45 (31.7)  | 38 (32.2) | 0.80 (0.46–1.41) | 0.89 (0.46–1.71) | 42 (36.2) | 2 (16.7) | 1.20 (0.04–1.12) | 0.26 (0.03–2.05) |
| p for trend         |            |           | 0.511            | 0.830            |           |          | 0.057            | 0.176            |

<sup>a</sup> The values are presented as tertiles of iron intake.

OR: odds ratio, CI: confidence interval

**Model I:** crude model; **Model II:** adjusted for age, first degree family history of GC, BMI, alcohol consumption, smoking status, education, occupation, monthly income. In the overall subjects, model II was additionally adjusted for gender.

**Supplementary material Table S2. Association of total iron intake and nonheme iron intake with risk of gastric cancer**  
**stratified by smoking status**

| Iron (mg/day)                   | Ever-smoker (current-smoker and ex-smoker) |                  |                       |                         | Non-smoker          |                  |                       |                        |
|---------------------------------|--------------------------------------------|------------------|-----------------------|-------------------------|---------------------|------------------|-----------------------|------------------------|
|                                 | No. of controls (%)                        | No. of cases (%) | Model I [OR (95% CI)] | Model II [OR (95% CI)]  | No. of controls (%) | No. of cases (%) | Model I [OR (95% CI)] | Model II [OR (95% CI)] |
| <b>Total iron<sup>a</sup></b>   |                                            |                  |                       |                         |                     |                  |                       |                        |
| <i>All</i>                      |                                            |                  |                       |                         |                     |                  |                       |                        |
| T1 (<12.04)                     | 152 (37.0)                                 | 90 (40.0)        | 1                     | 1                       | 99 (28.9)           | 57 (38.3)        | 1                     | 1                      |
| T2 (12.04–14.76)                | 137 (33.3)                                 | 94 (41.8)        | 1.16 (0.80–1.68)      | 1.37 (0.86–2.18)        | 113 (32.9)          | 44 (29.5)        | 0.68 (0.42–1.09)      | 0.95 (0.54–1.67)       |
| T3 (≥14.76)                     | 122 (29.7)                                 | 41 (18.2)        | 0.57 (0.37–0.88)      | <b>0.51 (0.29–0.88)</b> | 131 (38.2)          | 48 (32.2)        | 0.64 (0.40–1.01)      | 0.76 (0.44–1.32)       |
| p for trend                     |                                            |                  | 0.012                 | <b>0.016</b>            |                     |                  | 0.075                 | 0.223                  |
| <i>Males</i>                    |                                            |                  |                       |                         |                     |                  |                       |                        |
| T1 (<11.67)                     | 131 (32.8)                                 | 76 (36.0)        | 1                     | 1                       | 35 (36.5)           | 9 (27.3)         | 1                     | 1                      |
| T2 (11.67–14.30)                | 133 (33.3)                                 | 85 (40.3)        | 1.10 (0.74–1.63)      | 1.35 (0.83–2.21)        | 31 (32.3)           | 15 (45.4)        | 1.88 (0.72–4.90)      | 18.81 (2.93–121.0)     |
| T3 (≥14.30)                     | 136 (34.0)                                 | 50 (23.7)        | 0.63 (0.41–0.97)      | 0.59 (0.35–1.01)        | 30 (31.3)           | 9 (27.3)         | 1.17 (0.41–3.32)      | 3.52 (0.64–121.7)      |
| p for trend                     |                                            |                  | 0.029                 | 0.035                   |                     |                  | 0.870                 | 0.529                  |
| <i>Females</i>                  |                                            |                  |                       |                         |                     |                  |                       |                        |
| T1 (<12.68)                     | 4 (33.7)                                   | 8 (57.1)         | 1                     | 1                       | 81 (32.8)           | 55 (47.4)        | 1                     | 1                      |
| T2 (12.68–15.80)                | 4 (33.7)                                   | 4 (28.6)         | 0.50 (0.08–3.13)      | -                       | 83 (33.6)           | 31 (26.7)        | 0.55 (0.32–0.94)      | 0.79 (0.42–1.48)       |
| T3 (≥15.80)                     | 3 (27.3)                                   | 2 (14.3)         | 0.33 (0.04–2.88)      | -                       | 83 (33.6)           | 30 (25.9)        | 0.53 (0.31–0.91)      | 0.59 (0.31–1.10)       |
| P for trend                     |                                            |                  | 0.299                 | -                       |                     |                  | 0.024                 | 0.100                  |
| <b>Nonheme iron<sup>a</sup></b> |                                            |                  |                       |                         |                     |                  |                       |                        |
| <i>All</i>                      |                                            |                  |                       |                         |                     |                  |                       |                        |
| T1 (<9.10)                      | 154 (37.5)                                 | 107 (47.6)       | 1                     | 1                       | 97 (28.3)           | 55 (36.9)        | 1                     | 1                      |
| T2 (9.10–11.02)                 | 140 (34.1)                                 | 70 (31.1)        | 0.72 (0.49–1.05)      | 0.62 (0.39–1.00)        | 110 (32.1)          | 45 (30.2)        | 0.72 (0.45–1.17)      | 0.91 (0.50–1.60)       |
| T3 (≥11.02)                     | 117 (28.4)                                 | 48 (21.3)        | 0.59 (0.30–0.90)      | <b>0.54 (0.32–0.91)</b> | 136 (39.7)          | 49 (32.9)        | 0.64 (0.40–1.01)      | 0.76 (0.43–1.33)       |
| p for trend                     |                                            |                  | 0.012                 | <b>0.018</b>            |                     |                  | 0.068                 | 0.215                  |
| <i>Males</i>                    |                                            |                  |                       |                         |                     |                  |                       |                        |
| T1 (<8.86)                      | 133 (33.3)                                 | 87 (41.2)        | 1                     | 1                       | 33 (34.4)           | 12 (36.4)        | 1                     | 1                      |
| T2 (8.86–10.73)                 | 134 (33.4)                                 | 69 (32.7)        | 0.79 (0.53–1.17)      | 0.69 (0.42–1.13)        | 31 (32.3)           | 10 (30.3)        | 0.89 (0.34–2.35)      | 1.79 (0.45–7.05)       |

|                     |            |           |                   |                         |           |           |                  |                  |
|---------------------|------------|-----------|-------------------|-------------------------|-----------|-----------|------------------|------------------|
| T3 ( $\geq 10.73$ ) | 133 (33.3) | 55 (26.1) | 0.63 (0.42–0.96)  | <b>0.55 (0.33–0.93)</b> | 32 (33.3) | 11 (33.3) | 0.95 (0.37–2.45) | 1.20 (0.32–4.59) |
| p for trend         |            |           | 0.031             | <b>0.028</b>            |           |           | 0.923            | 0.880            |
| <b>Females</b>      |            |           |                   |                         |           |           |                  |                  |
| T1 ( $< 9.73$ )     | 4 (36.4)   | 11 (78.6) | 1                 | 1                       | 81 (32.8) | 55 (47.4) | 1                | 1                |
| T2 (9.73–11.69)     | 6 (54.6)   | 1 (7.1)   | 0.06 (0.01–0.67)  | -                       | 80 (32.4) | 23 (19.8) | 0.42 (0.24–0.75) | 0.51 (0.26–1.00) |
| T3 ( $\geq 11.69$ ) | 1 (9.0)    | 2 (14.3)  | 0.73 (0.05–10.39) | -                       | 86 (34.8) | 38 (32.8) | 0.65 (0.39–1.09) | 0.76 (0.41–1.42) |
| p for trend         |            |           | 0.370             | -                       |           |           | 0.166            | 0.470            |

<sup>a</sup> The values are presented as tertiles of iron intake.

OR: odds ratio, CI: confidence interval

**Model I:** crude model; **Model II:** adjusted for age, first degree family history of GC, alcohol consumption, BMI, education, occupation, monthly income, H. pylori infection. In the overall subjects, model II was additionally adjusted for gender

**Supplementary material Table S3. Association of total iron intake and nonheme iron intake with risk of gastric cancer**  
**stratified by regularly exercise**

| Iron (mg/day)                   | No                  |                  |                       |                        | Yes                 |                  |                       |                         |
|---------------------------------|---------------------|------------------|-----------------------|------------------------|---------------------|------------------|-----------------------|-------------------------|
|                                 | No. of controls (%) | No. of cases (%) | Model I [OR (95% CI)] | Model II [OR (95% CI)] | No. of controls (%) | No. of cases (%) | Model I [OR (95% CI)] | Model II [OR (95% CI)]  |
| <b>Total iron<sup>a</sup></b>   |                     |                  |                       |                        |                     |                  |                       |                         |
| <i>All</i>                      |                     |                  |                       |                        |                     |                  |                       |                         |
| T1 (<12.04)                     | 134 (41.0)          | 97 (40.6)        | 1                     | 1                      | 116 (27.4)          | 50 (37.0)        | 1                     | 1                       |
| T2 (12.04–14.76)                | 112 (34.3)          | 89 (37.2)        | 1.10 (0.75–1.61)      | 1.33 (0.84–2.11)       | 136 (32.1)          | 49 (36.3)        | 0.84 (0.53–1.33)      | 0.95 (0.55–1.64)        |
| T3 (≥14.76)                     | 81 (24.8)           | 53 (22.2)        | 0.90 (0.59–1.40)      | 0.82 (0.48–1.37)       | 172 (40.5)          | 36 (26.7)        | 0.49 (0.30–0.79)      | <b>0.47 (0.26–0.84)</b> |
| p for trend                     |                     |                  | 0.665                 | 0.456                  |                     |                  | 0.003                 | <b>0.008</b>            |
| <i>Males</i>                    |                     |                  |                       |                        |                     |                  |                       |                         |
| T1 (<11.67)                     | 96 (44.9)           | 52 (35.9)        | 1                     | 1                      | 69 (24.7)           | 33 (33.3)        | 1                     | 1                       |
| T2 (11.67–14.30)                | 67 (31.3)           | 57 (39.3)        | 1.57 (0.96–2.56)      | 2.64 (1.34–5.21)       | 95 (34.1)           | 43 (43.4)        | 0.95 (0.55–1.64)      | 1.16 (0.60–2.26)        |
| T3 (≥14.30)                     | 51 (23.8)           | 36 (24.8)        | 1.30 (0.76–2.25)      | 1.53 (0.75–3.15)       | 115 (41.2)          | 23 (23.3)        | 0.42 (0.23–0.70)      | <b>0.41 (0.20–0.85)</b> |
| p for trend                     |                     |                  | 0.316                 | 0.305                  |                     |                  | 0.003                 | <b>0.009</b>            |
| <i>Females</i>                  |                     |                  |                       |                        |                     |                  |                       |                         |
| T1 (<12.68)                     | 40 (35.4)           | 50 (53.2)        | 1                     | 1                      | 45 (31.0)           | 13 (36.1)        | 1                     | 1                       |
| T2 (12.68–15.80)                | 42 (37.2)           | 22 (23.4)        | 0.42 (0.22–0.81)      | 0.57 (0.26–1.26)       | 45 (31.0)           | 13 (36.1)        | 1.00 (0.42–0.39)      | 1.39 (0.47–4.11)        |
| T3 (≥15.80)                     | 31 (27.4)           | 22 (23.4)        | 0.57 (0.29–1.13)      | 0.57 (0.25–1.28)       | 55 (37.9)           | 10 (27.8)        | 0.63 (0.25–1.57)      | 0.77 (0.24–2.40)        |
| p for trend                     |                     |                  | 0.089                 | 0.163                  |                     |                  | 0.297                 | 0.584                   |
| <b>Nonheme iron<sup>a</sup></b> |                     |                  |                       |                        |                     |                  |                       |                         |
| <i>All</i>                      |                     |                  |                       |                        |                     |                  |                       |                         |
| T1 (<9.10)                      | 140 (42.8)          | 108 (45.2)       | 1                     | 1                      | 109 (25.7)          | 54 (40.0)        | 1                     | 1                       |
| T2 (9.10–11.02)                 | 102 (31.2)          | 70 (29.3)        | 0.89 (0.60–1.32)      | 0.91 (0.57–1.46)       | 148 (34.9)          | 45 (33.3)        | 0.61 (0.39–0.98)      | 0.55 (0.31–0.97)        |
| T3 (≥11.02)                     | 85 (26.0)           | 61 (25.5)        | 0.93 (0.62–1.41)      | 0.83 (0.50–1.38)       | 167 (39.4)          | 36 (66.7)        | 0.44 (0.27–0.71)      | <b>0.45 (0.25–0.81)</b> |
| p for trend                     |                     |                  | 0.722                 | 0.476                  |                     |                  | 0.001                 | <b>0.011</b>            |
| <i>Males</i>                    |                     |                  |                       |                        |                     |                  |                       |                         |
| T1 (<8.86)                      | 99 (46.3)           | 58 (40.0)        | 1                     | 1                      | 65 (23.3)           | 41 (41.4)        | 1                     | 1                       |
| T2 (8.86–10.73)                 | 66 (30.8)           | 47 (32.4)        | 1.22 (0.74–1.99)      | 1.30 (0.68–2.47)       | 99 (35.5)           | 32 (32.3)        | 0.51 (0.29–0.90)      | 0.38 (0.19–0.76)        |

|                     |           |           |                  |                  |            |           |                  |                         |
|---------------------|-----------|-----------|------------------|------------------|------------|-----------|------------------|-------------------------|
| T3 ( $\geq 10.73$ ) | 49 (22.9) | 40 (27.6) | 1.39 (0.82–2.36) | 1.46 (0.73–2.89) | 115 (41.2) | 26 (26.3) | 0.36 (0.20–0.64) | <b>0.29 (0.14–0.60)</b> |
| p for trend         |           |           | 0.214            | 0.282            |            |           | <0.001           | <b>0.002</b>            |
| <b>Females</b>      |           |           |                  |                  |            |           |                  |                         |
| T1 ( $< 9.73$ )     | 39 (34.1) | 53 (56.4) | 1                | 1                | 46 (31.7)  | 13 (36.1) | 1                | 1                       |
| T2 (9.73–11.69)     | 40 (35.4) | 16 (17.0) | 0.29 (0.14–0.60) | 0.37 (0.16–0.87) | 46 (31.7)  | 8 (22.2)  | 0.62 (0.23–1.63) | 0.85 (0.26–2.76)        |
| T3 ( $\geq 11.69$ ) | 34 (30.1) | 25 (26.6) | 0.54 (0.28–1.05) | 0.54 (0.25–1.21) | 53 (36.6)  | 15 (41.7) | 1.00 (0.43–2.32) | 1.44 (0.48–4.33)        |
| p for trend         |           |           | 0.081            | 0.153            |            |           | 0.835            | 0.464                   |

<sup>a</sup> The values are presented as tertiles of iron intake.

OR: odds ratio, CI: confidence interval

**Model I:** crude model; **Model II:** adjusted for age, first degree family history of GC, BMI, alcohol consumption, smoking status, education, occupation, monthly income, *H. pylori* infection. In the overall subjects, model II was additionally adjusted for gender.

**Supplementary material Table S4. Association of total iron intake and nonheme iron intake with risk of gastric cancer  
stratified by first degree family history of GC.**

| Iron (mg/day)             | No. of controls (%) | No. of cases (%) | Yes                   |                        | No. of controls (%) | No. of cases (%) | No                    |                         |
|---------------------------|---------------------|------------------|-----------------------|------------------------|---------------------|------------------|-----------------------|-------------------------|
|                           |                     |                  | Model I [OR (95% CI)] | Model II [OR (95% CI)] |                     |                  | Model I [OR (95% CI)] | Model II [OR (95% CI)]  |
| Total iron <sup>a</sup>   |                     |                  |                       |                        |                     |                  |                       |                         |
| All                       |                     |                  |                       |                        |                     |                  |                       |                         |
| T1 (<12.04)               | 37 (39.0)           | 35 (45.5)        | 1                     | 1                      | 213 (32.4)          | 112 (37.8)       | 1                     | 1                       |
| T2 (12.04–14.76)          | 35 (36.8)           | 25 (32.5)        | 0.76 (0.38–1.51)      | 0.97 (0.37–2.54)       | 214 (32.6)          | 113 (38.2)       | 1.00 (0.73–1.39)      | 1.19 (0.81–1.74)        |
| T3 (≥14.76)               | 23 (24.2)           | 17 (22.1)        | 0.78 (0.36–1.70)      | 0.82 (0.28–2.41)       | 230 (35.0)          | 71 (24.0)        | 0.59 (0.41–0.83)      | <b>0.60 (0.39–0.91)</b> |
| p for trend               |                     |                  | 0.518                 | 0.728                  |                     |                  | 0.002                 | <b>0.011</b>            |
| Males                     |                     |                  |                       |                        |                     |                  |                       |                         |
| T1(<11.67)                | 27 (38.0)           | 25 (45.5)        | 1                     | 1                      | 138 (32.6)          | 60 (31.9)        | 1                     | 1                       |
| T2 (11.67–14.30)          | 26 (36.6)           | 17 (30.9)        | 0.71 (0.31–1.60)      | 1.30 (0.38–4.51)       | 137 (32.4)          | 83 (44.2)        | 1.39 (0.93–2.10)      | 1.87 (1.13–3.08)        |
| T3 (≥14.30)               | 18 (25.4)           | 13 (23.6)        | 0.78 (0.32–1.91)      | 0.94 (0.25–3.53)       | 148 (35.0)          | 45 (23.9)        | 0.70 (0.45–1.10)      | 0.74 (0.43–1.28)        |
| p for trend               |                     |                  | 0.569                 | 0.933                  |                     |                  | 0.074                 | 0.166                   |
| Females                   |                     |                  |                       |                        |                     |                  |                       |                         |
| T1 (<12.68)               | 12 (50.0)           | 10 (45.5)        | 1                     | 1                      | 73 (31.2)           | 53 (49.1)        | 1                     | 1                       |
| T2 (12.68–15.80)          | 7 (29.2)            | 5 (22.7)         | 0.86 (0.21–3.55)      | 2.70 (0.24–30.4)       | 80 (34.2)           | 30 (27.8)        | 0.52 (0.30–0.89)      | 0.74 (0.39–1.42)        |
| T3 (≥15.80)               | 5 (20.8)            | 7 (31.8)         | 1.68 (0.41–6.96)      | 6.36 (0.45–89.4)       | 81 (34.6)           | 25 (23.1)        | 0.43 (0.24–0.75)      | 0.51 (0.26–1.00)        |
| p for trend               |                     |                  | 0.492                 | 0.151                  |                     |                  | 0.004                 | 0.053                   |
| Nonheme Iron <sup>a</sup> |                     |                  |                       |                        |                     |                  |                       |                         |
| Total                     |                     |                  |                       |                        |                     |                  |                       |                         |
| T1 (<9.10)                | 42 (44.2)           | 36 (46.8)        | 1                     | 1                      | 209 (31.8)          | 126 (42.6)       | 1                     | 1                       |
| T2 (9.10–11.02)           | 31 (32.6)           | 26 (33.8)        | 0.98 (0.49–1.94)      | 1.06 (0.42–2.72)       | 218 (33.2)          | 88 (29.7)        | 0.67 (0.48–0.93)      | 0.72 (0.49–1.07)        |
| T3 (≥11.02)               | 22 (23.2)           | 15 (19.4)        | 0.80 (0.36–1.76)      | 0.90 (0.29–2.82)       | 230 (35.0)          | 82 (27.7)        | 0.59 (0.42–0.83)      | <b>0.61 (0.41–0.91)</b> |
| p for trend               |                     |                  | 0.583                 | 0.874                  |                     |                  | 0.003                 | <b>0.019</b>            |
| Males                     |                     |                  |                       |                        |                     |                  |                       |                         |
| T1 (<8.86)                | 27 (38.0)           | 26 (47.3)        | 1                     | 1                      | 139 (32.9)          | 73 (38.8)        | 1                     | 1                       |
| T2 (8.86–10.73)           | 27 (38.0)           | 18 (32.7)        | 0.69 (0.31–1.55)      | 0.73 (0.23–2.32)       | 137 (32.4)          | 60 (31.9)        | 0.83 (0.55–1.26)      | 0.79 (0.48–1.31)        |

|                     |           |           |                  |                     |            |           |                  |                  |
|---------------------|-----------|-----------|------------------|---------------------|------------|-----------|------------------|------------------|
| T3 ( $\geq 10.73$ ) | 17 (23.9) | 11 (20.0) | 0.67 (0.27–1.70) | 0.82 (0.21–3.31)    | 147 (34.7) | 55 (29.3) | 0.71 (0.47–1.08) | 0.65 (0.39–1.09) |
| p for trend         |           |           | 0.375            | 0.755               |            |           | 0.117            | 0.107            |
| <b>Females</b>      |           |           |                  |                     |            |           |                  |                  |
| T1 ( $< 9.73$ )     | 12 (50.0) | 8 (36.4)  | 1                | 1                   | 73 (31.2)  | 58 (53.7) | 1                | 1                |
| T2 (9.73–11.69)     | 8 (33.3)  | 7 (31.8)  | 1.31 (0.34–5.08) | 1.16 (0.09–14.95)   | 78 (33.3)  | 17 (15.7) | 0.27 (0.15–0.51) | 0.37 (0.18–0.77) |
| T3 ( $\geq 11.69$ ) | 4 (16.7)  | 7 (31.8)  | 2.63 (0.57–12.0) | 14.13 (0.71–280.75) | 83 (35.5)  | 33 (30.6) | 0.50 (0.29–0.85) | 0.63 (0.33–1.21) |
| p for trend         |           |           | 0.214            | 0.082               |            |           | 0.023            | 0.226            |

<sup>a</sup> The values are presented as tertiles of iron intake.

OR: odds ratio, CI: confidence interval

**Model I:** crude model; **Model II:** adjusted for age, BMI, alcohol consumption, smoking status, education, occupation, monthly income, *H. pylori* infection. In the overall subjects, model II was additionally adjusted for gender.



Supplementary material Table S5. Associations of *TFRC* rs9846149 polymorphism with risk of gastric cancer

| rs9846149      | Model            | Genotype     | No (%)     |            | Model I          | OR (95% CI)      |                  |
|----------------|------------------|--------------|------------|------------|------------------|------------------|------------------|
|                |                  |              | Controls   | Cases      |                  | Model II         | Model III        |
| <b>Total</b>   | <b>Recessive</b> | <b>CC/GC</b> | 716 (95.0) | 358 (95.7) | 1                | 1                | 1                |
|                |                  | <b>GG</b>    | 38 (5.0)   | 16 (4.3)   | 0.84 (0.46–1.53) | 0.87 (0.46-1.67) | 0.89 (0.45–1.76) |
| <b>Males</b>   | <b>Recessive</b> | <b>CC/GC</b> | 471 (95.0) | 235 (96.3) | 1                | 1                | 1                |
|                |                  | <b>GG</b>    | 25 (5.0)   | 9 (3.7)    | 0.72 (0.33–1.57) | 0.73 (0.31-1.73) | 0.70 (0.28–1.75) |
| <b>Females</b> | <b>Recessive</b> | <b>CC/GC</b> | 245 (95.0) | 123 (94.6) | 1                | 1                | 1                |
|                |                  | <b>GG</b>    | 13 (5.0)   | 7 (5.4)    | 1.07 (0.42–2.76) | 1.35 (0.48-3.77) | 1.38 (0.49–4.36) |

*C: major allele; G: minor allele*

*CC/GC: dominant phenotypes; GG: recessive phenotypes*

*OR: odds ratio, CI: confidence interval*

**Model I:** crude model; **Model II:** adjusted for age, BMI, first degree family history of GC, smoking status, alcohol consumption, education, occupation, monthly income; **Model III:** additionally adjusted for *Helicobacter pylori* infection. In the overall subjects, models II, and III were additionally adjusted for gender.
